# Supplementary material for: A New Family of HEAT-Like Repeat Proteins Lacking a Critical Substrate Recognition Motif Present in Related DNA Glycosylases
Source: PLOS journal article supplement (doi:10.1371/journal.pone.0127733), 2015-05-15
Supplement: S3 (10.1371/journal.pone.0127733.s003) [file journal.pone.0127733.s003]

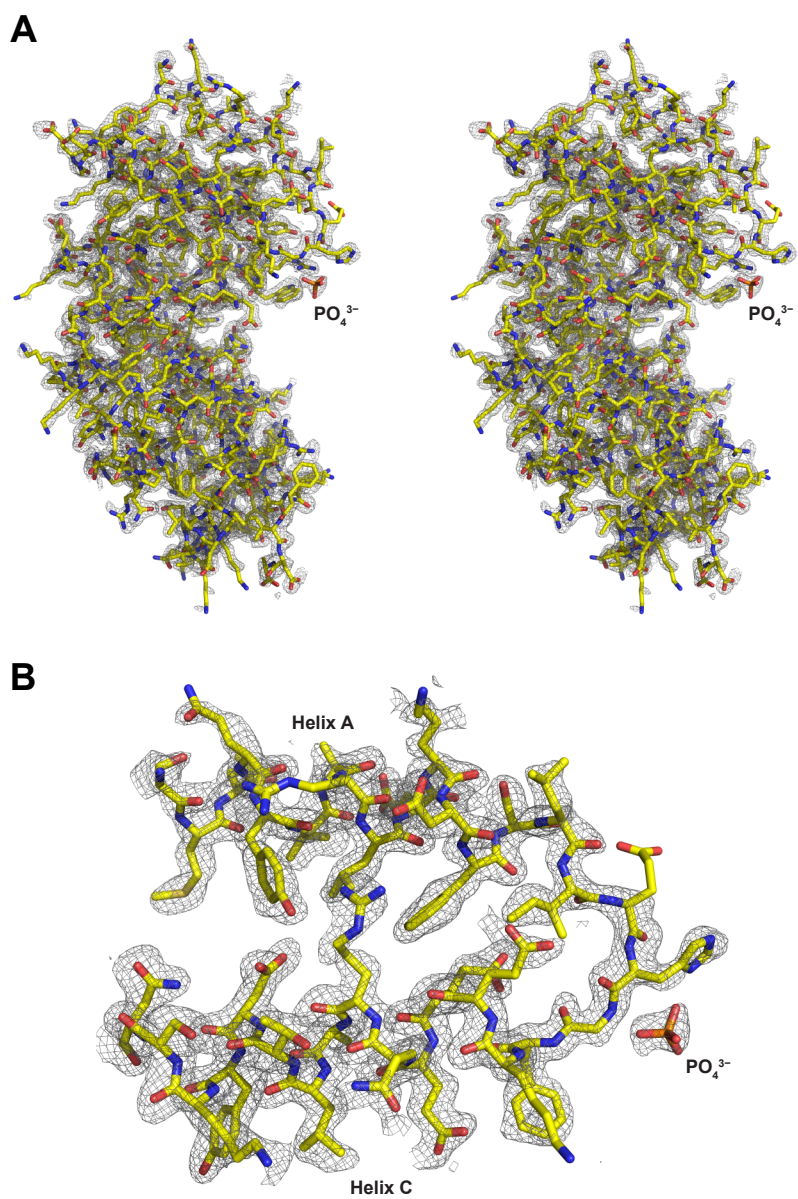

**Figure S3. Electron density for SmAlkD2.** (A) Complete protein. (B) A–C motif. The 1.7-Å annealed composite omit map was calculated from the final SmAlkD2 model and contoured at  $1\sigma$ .
